# Supplementary material for: FLT3 activating mutations display differential sensitivity to multiple tyrosine kinase inhibitors
Source: PubMed Central journal article supplement (PMC5355235; doi:10.18632/oncotarget.14539), 2017-01-06
Supplement: oncotarget-08-10931-s001.pdf [file oncotarget-08-10931-s001.pdf]

## FLT3 activating mutations display differential sensitivity to multiple tyrosine kinase inhibitors

Bao Nguyen<sup>1,\*</sup>, Allen B. Williams<sup>1,\*</sup>, David J. Young<sup>1,2</sup>, Hayley Ma<sup>1</sup>, Li Li<sup>1</sup>, Mark Levis<sup>1</sup>, Patrick Brown<sup>1,2</sup> and Donald Small<sup>1,2</sup>

<sup>1</sup> Department of Oncology, Johns Hopkins University School of Medicine, Baltimore, MD, USA

<sup>2</sup> Department of Pediatrics Johns Hopkins University School of Medicine, Baltimore, MD, USA

\* These authors have contributed equally to this work

**Correspondence to:** Donald Small, **email:** donsmall@jhmi.edu

**Keywords:** acute myeloid leukemia, mutant FLT3, activation loop, tyrosine kinase inhibitors

**Received:** December 16, 2016

**Accepted:** December 25, 2016

**Published:** January 06, 2017

### Supplemental Table 1. Primer sequences

D835A-F, GTGACTTTGGATTGGCTCGAGCTATCATGAGTGATTCCAAC;

D835A-R, GTTGAATCACTCATGATAGCTCGAGCCAATCCAAAGTCAC;

D835G-F, GTGACTTTGGATTGGCTCGAGGTATCATGAGTGATTCCAAC;

D835G-R, GTTGAATCACTCATGATAGCTCGAGCCAATCCAAAGTCAC;

D835N-F, GTGACTTTGGATTGGCTCGAAATATCATGAGTGATTCCAAC;

D835N-R, GTTGAATCACTCATGATATTTTCGAGCCAATCCAAAGTCAC;

D835L+K-F, GTGACTTTGGATTGGCTCGACTTAAAATCATGAGTGATTCCAAC;

D835L+K-R, GTTGAATCACTCATGATTTTAAGTCGAGCCAATCCAAAGTCAC;

D835Y-F, GTGACTTTGGATTGGCTCGATATATCATGAGTGATTCCAAC;

D835Y-R, GTTGAATCACTCATGATATATCGAGCCAATCCAAAGTCAC;

I836L+D-F, GTGACTTTGGATTGGCTCGAGATCTCGACATGAGTGATTCCAAC;

I836L+D-R, GTTGAATCACTCATGTCTCGAGATCTCGAGCCAATCCAAAGTCAC;

I836S-F, GTGACTTTGGATTGGCTCGAGATAGCATGAGTGATTCCAAC;

I836S-R, GTTGAATCACTCATGCTATCTCGAGCCAATCCAAAGTCAC;

I836T-F, GTGACTTTGGATTGGCTCGAGATACCATGAGTGATTCCAAC;

I836T-R, GTTGAATCACTCATGGTATCTCGAGCCAATCCAAAGTCAC;

840G+S-F, GATATCATGAGTGATTCCGGCAGCAACTATGTTGTCAGGGGCAAT;

840G+S-R, ATTGCCCTGACAACATAGCCGTTGCTGGAATCACTCATGATATC.
